# Supplementary material for: Economical and effective sulfide catalysts for dye-sensitized solar cells as counter electrodes
Source: Royal Society of Chemistry journal article supplement (doi:10.1039/c1cp22819f), 2011-01-01
Supplement: c1cp22819f.pdf [file c1cp22819f.pdf]

## Supplementary Information

### **Economical and effective sulfide catalysts for dye-sensitized solar cells as counter electrodes**

Mingxing Wu, Yudi Wang, Xiao Lin, Naisen Yu, Liang Wang, Linlin Wang, Anders Hagfeldt, Tingli Ma

**Synthesis of MoS<sub>2</sub>** Na<sub>2</sub>MoO<sub>4</sub> (2.42 g, 10 mmol), thiourea (3.12 g, 40 mmol) and 0.5 g PEG-600 were dissolved in distilled water (60 mL). Stir for 30 min and then transfer the solution into a teflon-lined stainless autoclave. After heated at 200 °C for 48 h, the autoclave was cooled to room temperature. The precipitates were collected by filter. And the precipitates were washed with ethanol and water and the dried at 300 °C. The purified MoS<sub>2</sub> was obtained.

**Synthesis of WS<sub>2</sub>** Na<sub>2</sub>WO<sub>4</sub> (0.99 g, 3 mmol), thioacetamide (0.68 g, 9 mmol), and cetyltrimethylammonium bromide (CTAB, 3.28 g, 9 mmol) were dissolved in distilled water (60 mL). The solution was stirred for 2 h and then transformed into an autoclave. The autoclave was heat at 200 °C for one week and the intermediate was prepared. Then the intermediate was sintered at 850 °C for 12 h in N<sub>2</sub> atmosphere and WS<sub>2</sub> was obtained.

**Electrodes and Cells fabrication** Five layers of TiO<sub>2</sub> (solaronix D, Swiss) nanocrystalline film sensitized with N719 (Solaronix, Swiss) were used as photoanodes. A thin layer of TiO<sub>2</sub> was coated on F-doped tin oxide (FTO) conductive

glass using the screen printing technique. The TiO<sub>2</sub> film was sintered at 200 °C for 15 min. The process was repeated four times and five layers of TiO<sub>2</sub> film were obtained. After sintering at 500 °C for 10 min and the subsequent cooling to room temperature, the TiO<sub>2</sub> film was treated with 40 mM TiCl<sub>4</sub> aqueous solution and washed with distilled water. After sintering at 500 °C for 30 min, the mesoporous nanocrystalline TiO<sub>2</sub> film was completely fabricated with a thickness of approximately 12 μm. The photoanode was obtained after the TiO<sub>2</sub> film was pre-heated to 80 °C and immersed in a  $5 \times 10^{-4}$  M solution of N719 dye (Solaronix SA, Switzerland) in acetonitrile/*tert*-butyl alcohol (1:1 volume ratio) for 20 h and the photoanode was obtained. Two kinds of redox couples were used in this research. The first is triiodide/iodide. The triiodide/iodide electrolyte contains 0.06 M of LiI, 0.6 M 1-butyl-3-methylimidazolium iodide, 0.03 M I<sub>2</sub>, 0.5 M 4-*tert*-butyl pyridine, and 0.1 M guanidiniumthiocyanate in acetonitrile. The second is 5-mercapto-1-methyltetrazole di-5-(1-methyltetrazole) disulfide/ *N*-tetramethylammonium salt (<sup>+</sup>NMe<sub>4</sub>T<sup>-</sup>) (T<sub>2</sub>/T<sup>-</sup>, Fig. S2). The T<sub>2</sub>/T<sup>-</sup> electrolyte contains 0.4 M <sup>+</sup>NMe<sub>4</sub>T<sup>-</sup>, 0.4 M di-5-(1-methyltetrazole) disulfide (T<sub>2</sub>), 0.05M LiClO<sub>4</sub> and 0.5 M 4-*tert*-butylpyridine (TBP) in acetonitrile/ethylene carbonate (6:4, volume ratio). MoS<sub>2</sub> and WS<sub>2</sub> counter electrodes was fabricated with spray-coating technique as follow. 200 mg of the as-prepared MoS<sub>2</sub> or WS<sub>2</sub> was dispersed in 4 mL isopropanol. The solution was then ultrasonically dispersed for 30 min and the pastes for the spraying were obtained. The prepared pastes were sprayed onto an FTO glass with an air brush. Subsequently, the FTO glass coated with sulfide pastes was sintered in N<sub>2</sub> atmosphere at 500 °C for 30

min and the CEs were prepared. The thickness of sulfide CEs is around 20 μm. Pt deposited on FTO glass was used as Pt CE.<sup>1</sup> A DSC was assembled with a photoanode and counter electrode clipping the electrolyte. And the DSC was sealed with a double-faced insulated adhesive tape. A symmetrical cell was assembled with two identical counter electrodes clipping the electrolyte used for EIS and Tafel-polarization measurements.

**Measurements** XRD tests were carried out with an automatic X-ray powder diffractometer (D/Max 2400, RIGAKU). Surface morphologies of the sulfides powder were checked by scanning electron microscopy (SEM, FEI QUANTA 450). Cyclic voltammetry (CV) was carried out in a three-electrode system in an argon-purged acetonitrile solution which contained 0.1 M LiClO<sub>4</sub>, 10 mM LiI, and 1 mM I<sub>2</sub> at a scan rate of 10, 20, 50, or 100 mV s<sup>-1</sup> using a electrochemical analyzer (CHI630, Chenhua, Shanghai). Pt served as a counter electrode, and Ag/Ag<sup>+</sup> as a reference electrode. The photocurrent density-voltage performance of the DSCs was tested in simulated AM 1.5 illumination (I=100 mW cm<sup>-2</sup>, PEC-L15, Peccell, Japan) with a digital source meter (Keithley 2601, USA). EIS experiments were carried out with symmetrical cells using a computer-controlled potentiostat (Zennium Zahner, Germany) in the dark. The measured frequency ranged from 100 m Hz to 1 M Hz. The amplitude of the alternating current was set at 10 mV. Tafel-polarization measurements were measured with an electrochemical workstation system (CHI 630, Chenhua, Shanghai) in a symmetrical dummy cell. The scan rate was 10 mV s<sup>-1</sup>.
